# Supplementary material for: On the stability in alkaline conditions and electrochemical performance of A2BO4-type cathodes for liquid fuel cells
Source: Royal Society of Chemistry journal article supplement (doi:10.1039/c8cp02114g), 2018-01-01
Supplement: c8cp02114g1.pdf [file c8cp02114g1.pdf]

ELECTRONIC SUPPORTING INFORMATION

**Table S1:** Lattice parameters obtained from the refined powder XRD patterns collected on the as synthesized materials and after the stability tests in 2 M NaOH solution.

| Sample                                               |                | Phase | Cell parameters |        |        |                       | Secondary phases (wt.%)                        |
|------------------------------------------------------|----------------|-------|-----------------|--------|--------|-----------------------|------------------------------------------------|
|                                                      |                |       | a (Å)           | b (Å)  | c (Å)  | Vol (Å <sup>3</sup> ) |                                                |
| La <sub>2</sub> NiO <sub>4</sub>                     | as synthesised | Fmmm  | 5.458           | 5.461  | 12.693 | 378.3                 | La <sub>2</sub> O <sub>3</sub> (4.9) NiO (4.1) |
|                                                      | 2 M NaOH       | Fmmm  | 5.456           | 5.462  | 12.697 | 378.4                 | La <sub>2</sub> O <sub>3</sub> (5.8) NiO (5.5) |
| La <sub>1.8</sub> Ce <sub>0.2</sub> NiO <sub>4</sub> | as synthesised | Fmmm  | 5.448           | 5.447  | 12.681 | 376.3                 | CeO <sub>2</sub> (11.4)                        |
|                                                      | 2 M NaOH       | Fmmm  | 5.449           | 5.448  | 12.684 | 376.5                 | CeO <sub>2</sub> (11.3)                        |
| La <sub>1.9</sub> Pr <sub>0.1</sub> NiO <sub>4</sub> | as synthesised | Fmmm  | 5.458           | 5.458  | 12.671 | 377.5                 | none                                           |
|                                                      | 2 M NaOH       | Fmmm  | 5.457           | 5.457  | 12.670 | 377.3                 | none                                           |
| La <sub>1.8</sub> Pr <sub>0.2</sub> NiO <sub>4</sub> | as synthesised | Fmmm  | 5.454           | 5.454  | 12.666 | 376.8                 | none                                           |
|                                                      | 2 M NaOH       | Fmmm  | 5.454           | 5.452  | 12.664 | 376.6                 | none                                           |
| La <sub>1.9</sub> Sr <sub>0.1</sub> NiO <sub>4</sub> | as synthesised | Fmmm  | 5.444           | 5.446  | 12.697 | 376.4                 | (La,Sr)NiO <sub>3</sub> (traces)               |
|                                                      | 2 M NaOH       | Fmmm  | 5.445           | 5.445  | 12.696 | 376.4                 | (La,Sr)NiO <sub>3</sub> (traces)               |
| La <sub>2</sub> CuO <sub>4</sub>                     | as synthesised | Bmcb  | 5.353           | 13.153 | 5.393  | 379.7                 | none                                           |
|                                                      | 2 M NaOH       | Bmcb  | 5.353           | 13.153 | 5.394  | 379.8                 | none                                           |
| La <sub>1.9</sub> Pr <sub>0.1</sub> CuO <sub>4</sub> | as synthesised | Bmcb  | 5.356           | 13.144 | 5.404  | 380.4                 | none                                           |
|                                                      | 2 M NaOH       | Bmcb  | 5.404           | 13.143 | 5.355  | 380.3                 | none                                           |
| La <sub>1.9</sub> Sr <sub>0.1</sub> CuO <sub>4</sub> | as synthesised | Bmcb  | 5.344           | 13.193 | 5.351  | 377.3                 | none                                           |
|                                                      | 2 M NaOH       | Bmcb  | 5.345           | 13.199 | 5.355  | 377.8                 | none                                           |

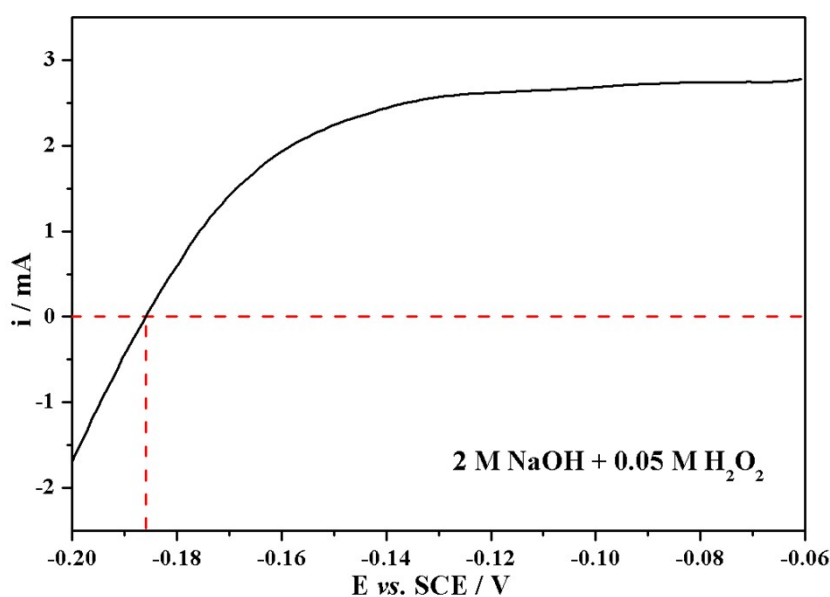

**Figure S1:** LSV of a Pt electrode at 10 mV s<sup>-1</sup> in 0.05 M H<sub>2</sub>O<sub>2</sub> + 2 M NaOH solution (pre-saturated with H<sub>2</sub>) used for calibration of SCE to RHE reference scale. Similar curves were recorded for the solutions containing 0.5 and 1 M H<sub>2</sub>O<sub>2</sub>. From these measurements, the formula  $E_{RHE} = E_{SCE} + 0.186$  V, 0.215 V or 0.219 V, for 0.05 M, 0.5 M or 1 M H<sub>2</sub>O<sub>2</sub> solutions, respectively, was determined.

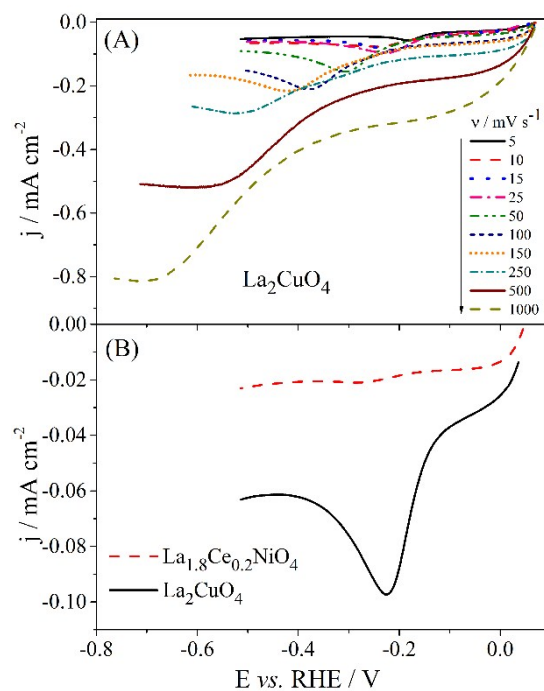

**Figure S2:** Effect of potential scan rate on the LSVs of  $\text{La}_2\text{CuO}_4$  in  $0.05 \text{ M H}_2\text{O}_2 + 2 \text{ M NaOH}$  (A) and comparison of LSVs of  $\text{La}_2\text{CuO}_4$  and  $\text{La}_{1.8}\text{Ce}_{0.2}\text{NiO}_4$  electrodes at  $25 \text{ mV s}^{-1}$  (B).

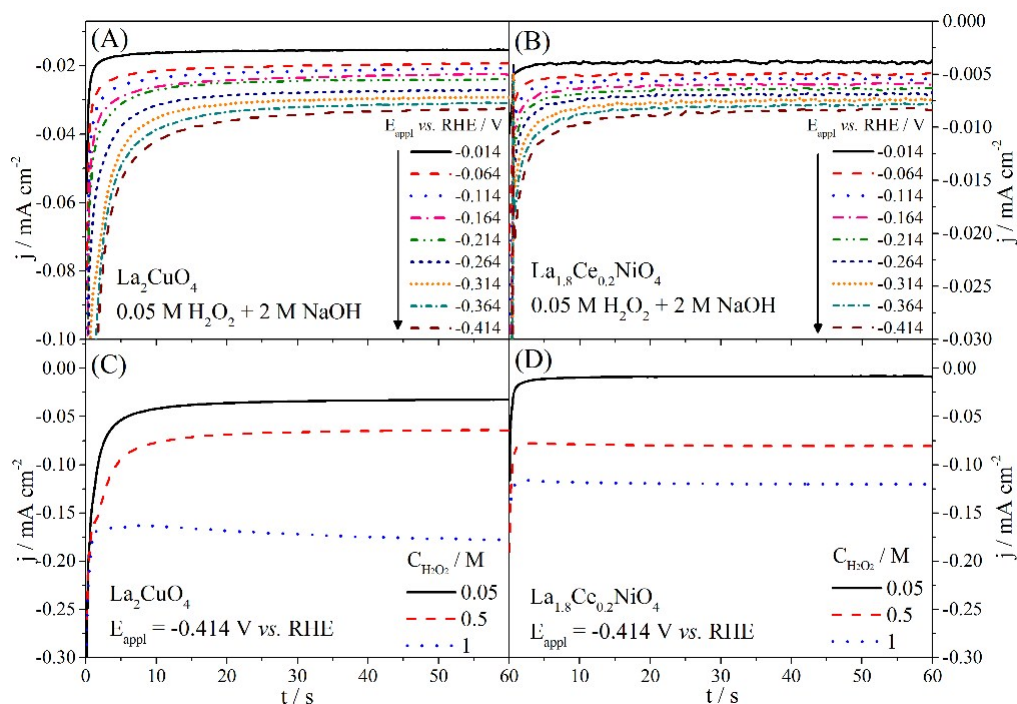

**Figure S3:** CA curves of  $\text{La}_2\text{CuO}_4$  (A) and  $\text{La}_{1.8}\text{Ce}_{0.2}\text{NiO}_4$  (B) electrodes in  $0.05 \text{ M H}_2\text{O}_2 + 2 \text{ M NaOH}$  solutions for different applied potentials, and CA curves of  $\text{La}_2\text{CuO}_4$  (C) and  $\text{La}_{1.8}\text{Ce}_{0.2}\text{NiO}_4$  (D) in solutions with different  $\text{H}_2\text{O}_2$  concentrations at applied potential of  $-0.414 \text{ V}$ .

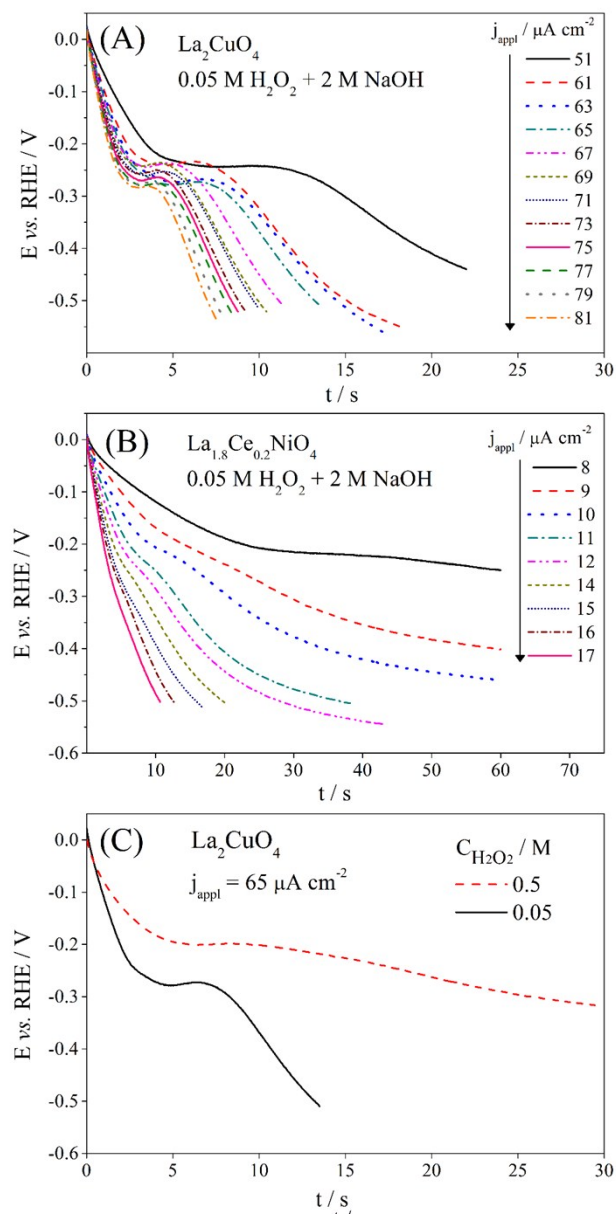

**Figure S4:** CP curves of  $\text{La}_2\text{CuO}_4$  (A) and  $\text{La}_{1.8}\text{Ce}_{0.2}\text{NiO}_4$  (B) electrodes in  $0.05 \text{ M H}_2\text{O}_2 + 2 \text{ M NaOH}$ , and of  $\text{La}_2\text{CuO}_4$  in two different  $\text{H}_2\text{O}_2$  concentrations and current density of  $65 \mu\text{A cm}^{-2}$  (C).
